# Supplementary material for: Multivariate Assessment of Genetic Relationships between Two Streptocarpus Cultivars and Their F1 Progenies Using Morphological Characteristics and SCoT Molecular Markers
Source: MDPI journal article supplement (doi:10.3390/horticulturae9040497), 2023-04-15
Supplement: s1 [file s1]

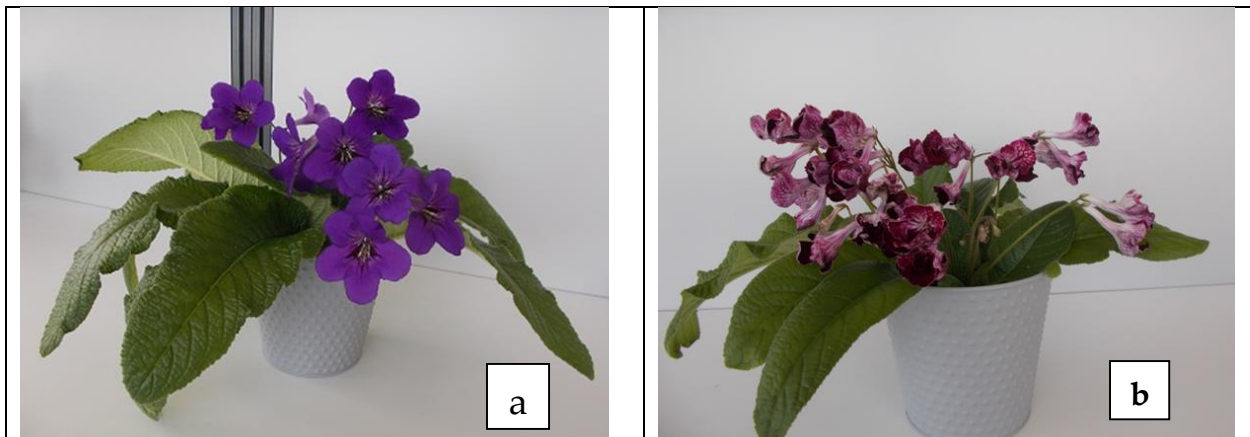

Figure S3: The visual appearance and flower color of P1xP2.33 (a) and P2xP1.21 (b) *Streptocarpus* genotypes selected for future breeding programs.
