# Supplementary material for: Multivariate Assessment of Genetic Relationships between Two Streptocarpus Cultivars and Their F1 Progenies Using Morphological Characteristics and SCoT Molecular Markers
Source: MDPI journal article supplement (doi:10.3390/horticulturae9040497), 2023-04-15
Supplement: s1 [file s1]

Table S2. The nucleotide sequence of SCoT primers used to assess the genetic relationships between parents and F1 progeny

| Primer name | Primer sequence 5'-3' |
|-------------|-----------------------|
| SCoT 1      | CAATGGCTACCACTAGCC    |
| SCoT 3      | CAATGGCTACCACTAGCG    |
| SCoT 6      | ACAATGGCTACCACCATC    |
| SCoT 7      | CCATGGCTACCACTAGCA    |
| SCoT 9      | CAACAATGGCTACCACCG    |
| SCoT 12     | ACGACATGGCGACCAACG    |
| SCoT13      | ACGACATGGCGACCATCG    |
| SCoT14      | ACGACATGGCGACCACGC    |
| SCoT15      | ACGACATGGCGACCGCGA    |
