# Supplementary material for: Multivariate Assessment of Genetic Relationships between Two Streptocarpus Cultivars and Their F1 Progenies Using Morphological Characteristics and SCoT Molecular Markers
Source: MDPI journal article supplement (doi:10.3390/horticulturae9040497), 2023-04-15
Supplement: s1 [file s1]

Table S1. Flower color characteristics of parents (P1and P2) and F1 plants from P1xP2 and P2xP1 crosses

| Parents and crosses codes | Color group    | RHS code | hexRGB code | UCL name              | Color patern image                                                                    |
|---------------------------|----------------|----------|-------------|-----------------------|---------------------------------------------------------------------------------------|
| P1-“Natalie”              | I. Violet-blue | 91B      | #9d7ecd     | Light Violet          |    |
| P2-“Bristol’s Gum Drop”   | II. Red-purple | 60A      | #6d0b22     | Deep red              |    |
| P1xP2                     | I. Violet-blue | 94B      | # 3e39a1    | Strong purplish- blue |    |
|                           |                | 95D      | # 8d8dcf    | Light-purplish blue   |    |
|                           | II. Red-purple | 59D      | #a42650     | Strong Purplish Red   |    |
|                           |                | 60C      | #89143a     | Strong Purplish Red   |    |
|                           |                | 64A      | #781239     | Moderate Purplish Red |    |
|                           |                | 74B      | #9f1a70     | Vivid Reddish Purple  |   |
| P2xP1                     | I. Violet-blue | 93D      | #6b5ebc     | Light Violet          |  |
|                           |                | 94D      | #7672d6     | Light Violet          |  |
|                           |                | 88A      | #451389     | Vivid violet          |  |
|                           |                | 93C      | #422f8f     | Strong violet         |  |
| P2xP1                     | II. Red-purple | 59D      | #a42650     | Strong Purplish Red   |  |
|                           |                | 67B      | # bc1e6a    | Vivid Purplish Red    |  |
|                           |                | 68A      | #c5388b     | Deep Purplish Pink    |  |
|                           |                | 73C      | #eb8bd8     | Light Purplish Pink   |  |
