# Supplementary material for: Multivariate Assessment of Genetic Relationships between Two Streptocarpus Cultivars and Their F1 Progenies Using Morphological Characteristics and SCoT Molecular Markers
Source: MDPI journal article supplement (doi:10.3390/horticulturae9040497), 2023-04-15
Supplement: s1 [file s1]

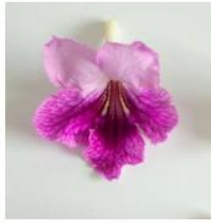

P2 x P1.2

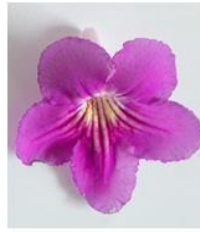

P2 x P1.19

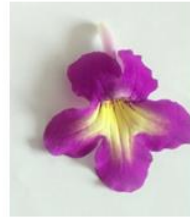

P2 x P1.35

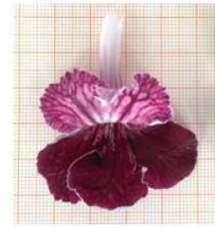

P2 x P1.21

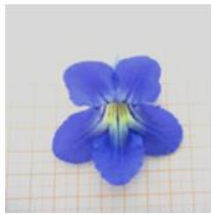

P2 x P1.25

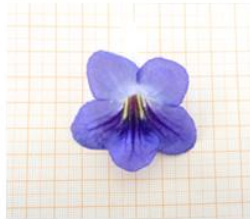

P2 x P1.24

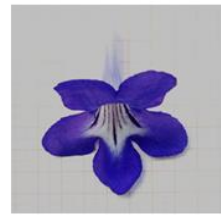

P2 x P1.18

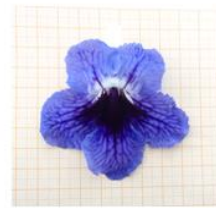

P2 x P1.3

Figure S2. The representative colors of *Streptocarpus* F1 plants from P2xP1 cross
