# Supplementary figures and images for: Multivariate Assessment of Genetic Relationships between Two Streptocarpus Cultivars and Their F1 Progenies Using Morphological Characteristics and SCoT Molecular Markers
Source: MDPI journal article supplement (doi:10.3390/horticulturae9040497), 2023-04-15

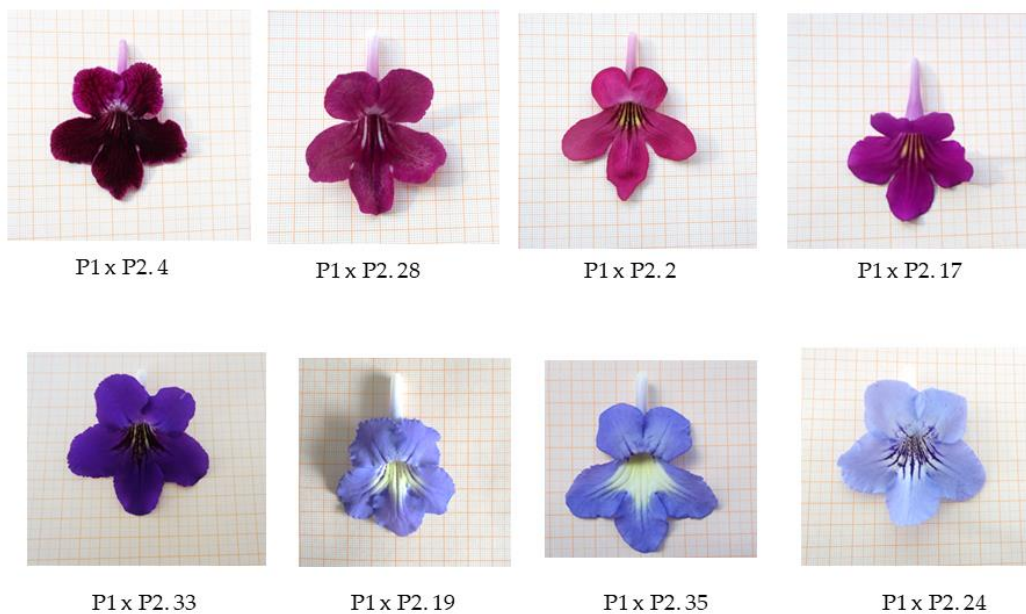

Figure S1. The representative colors of *Streptocarpus* F1 plants from P1xP2 cross

Supplement: s1 [file s1]
